# Supplementary material for: Satisfaction with life among university students from nine countries: Cross-national study during the first wave of COVID-19 pandemic
Source: Springer Nature journal article supplement (doi:10.1186/s12889-021-12288-1), 2021-12-01

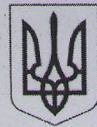

**МІНІСТЕРСТВО ОСВІТИ І НАУКИ УКРАЇНИ**  
**Львівський державний університет фізичної культури**  
**імені Івана Боберського**

вул. Костюшка, 11, м. Львів, 79007, тел: (032)255-32-01, факс: (032)255-32-08  
E-mail: [info@ldufk.edu.ua](mailto:info@ldufk.edu.ua) Код ЄДРПОУ 34606048

№ \_\_\_\_\_

На № \_\_\_\_\_

To whom it may concern.

The study regarding analysis undergraduates' wellbeing during the COVID-19 pandemic is held after consideration by the Bioethics Committee of Lviv State University of Physical Culture and the adoption of a positive decision (protocol number 4 (2020-04-01)).

According to the purpose of research, a survey at universities during the second semester of the academic year 2019/2020 was planned. Written informed consent for participating is obtained from every student and will be kept by Dr. Pavlova Y. Students that are willing to take part in survey fill out questionnaire which is completely anonymous. All procedures performed in studies involving human participants were following the ethical standards of the research committee and with the 1964 Helsinki declaration and its later amendments, and relevant institutional and national research committee ethical standards.

Head of the Bioethics Committee  
of Lviv State University of Physical Culture

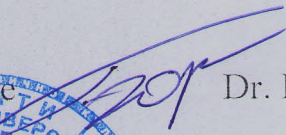 Dr. Boretsky Y.

First Vice-rector  
Of Lviv State University of Physical Culture

 Dr. Muzyka F.

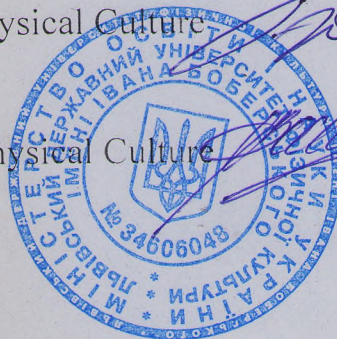

Supplement: MOESM2 [file 19950796]
